# Supplementary material for: Improving sensing of formaldehyde using ZnO nanostructures with surface-adsorbed oxygen
Source: Royal Society of Chemistry journal article supplement (doi:10.1039/d1na00804h), 2021-12-03
Supplement: d1na00804h1.pdf [file d1na00804h1.pdf]

## Improving Formaldehyde Sensing of ZnO Nanostructures with Surface-adsorbed oxygen

Sherif Abdulkader Tawfik, Hang Tran and Michelle J.S. Spencer\*

*School of Science, RMIT University, GPO Box 2476, Melbourne, Victoria 3001, Australia*

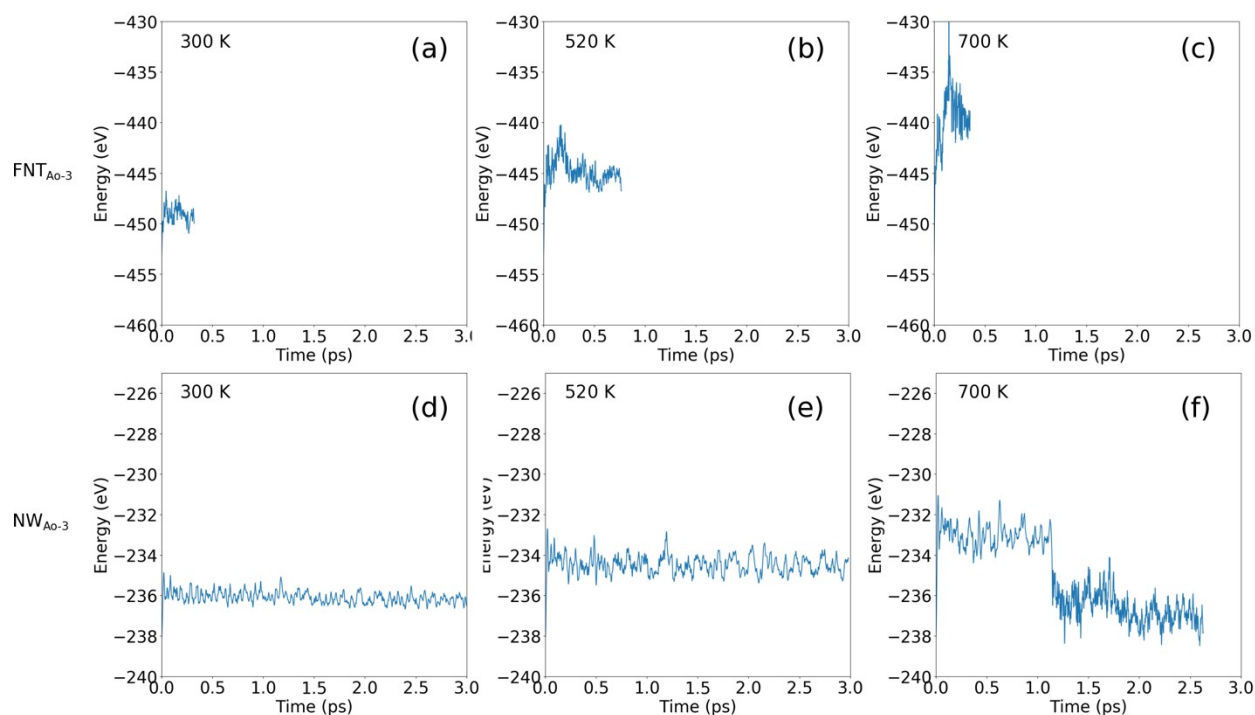

**Figure S1:** Evolution of the total system energy of the FNT<sub>Ao-3</sub> and NW<sub>Ao-3</sub> structures as function of time, by applying *ab initio* molecular dynamics, and at three temperatures: 300K, 520K and 700K. We have run the simulations in (a), (b) and (c) for shorter times because, for the case of (a), the system equilibrated to a reversible surface reaction (Equation 6), while for (b) and (c), the simulation resulted in the dissociation of the adsorbed HCO species into reaction products in their gaseous phase.
